# Supplementary material for: Nuclear actin polymerization rapidly mediates replication fork remodeling upon stress by limiting PrimPol activity
Source: PubMed Central journal article supplement (PMC10684888; doi:10.1038/s41467-023-43183-5), 2023-11-28
Supplement: 41467_2023_43183_MOESM3_ESM.pdf [file 41467_2023_43183_MOESM3_ESM.pdf]

## **Description of Additional Supplementary Files**

File Name: Supplementary Data 1

Description: List of antibodies used in this study.

File Name: Supplementary Data 2

Description: List of specific chemicals used in this study.

File Name: Supplementary Movie 1

Description: corresponding to Supplementary Fig. 1c. U2OS cells stably expressing nAC-GFP were stimulated by 750 nM A23187 to visualize nuclear F-actin polymerization.

File Name: Supplementary Movie 2

Description: corresponding to Supplementary Fig. 1c. Transient formation of nuclear F-actin after cell division in U2OS cells stably expressing nAC-GFP.

File Name: Supplementary Movie 3

Description: corresponding to Supplementary 1e. Distinct and transient nuclear actin filaments are detected in replicating U2OS cells stably expressing nAC-GFP.
